# Supplementary material
Source: PubMed Central journal article supplement (PMC4197879)
Supplement: embr0015-0686-sd4.pdf [file embr0015-0686-sd4.pdf]

**Table S1** Validation of the DYRK1A-depletion array data by RT-qPCR on a series of genes mostly involved in immune response. The genes listed in column 1 were designated by Affimetrix Exon 1.0 array analysis as regulated by DYRK1A (columns 2 and 3). To confirm this, total RNA was prepared from HeLa cells either transfected with non-targeting control siRNAs or two different DYRK1A siRNAs (columns 4-5 and 6-7). Variations in mRNA levels for the indicated genes were then assessed by RT-qPCR. To further document that these genes are under the control of DYRK1A, total RNA was prepared from HEK293T cells containing inducible constructs for DYRK1A either WT or with a K188R mutation, before and after induction with ponasterone. Variations in mRNA levels for the indicated genes were then assessed by RT-qPCR (column 8-9). Data shown are means from three independent experiments. For each data set, the significance of the differences was estimated using Student's *t*-test.

| 1               | 2                                                                                                 | 3         | 4                                                                                              | 5         | 6                                                                                              | 7         | 8                                                                                            | 9         |
|-----------------|---------------------------------------------------------------------------------------------------|-----------|------------------------------------------------------------------------------------------------|-----------|------------------------------------------------------------------------------------------------|-----------|----------------------------------------------------------------------------------------------|-----------|
|                 | Fold change in mRNA levels in HeLa cells upon depletion of DYRK1A with siRNA #1 (Microarray data) | p-Values  | Fold change in mRNA levels in HeLa cells upon depletion of DYRK1A with siRNA #1 (RT-qPCR data) | p-Values  | Fold change in mRNA levels in HeLa cells upon depletion of DYRK1A with siRNA #2 (RT-qPCR data) | p-Values  | Fold change in mRNA levels in HEK293T cells upon over-expression of WT DYRK1A (RT-qPCR data) | p-Values  |
| <i>CXCL1</i>    | -2.77                                                                                             | 1.77 E-04 | -1.88                                                                                          | 1.11 E-02 | -2.08                                                                                          | 4.97 E-02 | +1.56                                                                                        | 2.00 E-02 |
| <i>CXCL2</i>    | -2.01                                                                                             | 2.35 E-02 | -1.81                                                                                          | 9.35 E-03 | -1.81                                                                                          | 9.36 E-02 | +1.92                                                                                        | 5.48 E-04 |
| <i>CCL13</i>    | -1.65                                                                                             | 2.85 E-03 | -1.85                                                                                          | 1.57 E-03 | -1.31                                                                                          | 2.09 E-02 | +1.28                                                                                        | 6.22 E-02 |
| <i>CHUK</i>     | -1.63                                                                                             | 7.20 E-03 | -2.38                                                                                          | 1.42 E-02 | -1.85                                                                                          | 2.14 E-01 | +1.63                                                                                        | 1.96 E-01 |
| <i>MICB</i>     | -1.87                                                                                             | 4.40 E-04 | -2.17                                                                                          | 2.67 E-05 | -1.28                                                                                          | 1.22 E-01 | +1.28                                                                                        |           |
| <i>FAS</i>      | -1.68                                                                                             | 1.43 E-03 | -1.78                                                                                          | 1.08 E-03 | -1.88                                                                                          | 1.77 E-01 | +1.13                                                                                        | 2.91 E-01 |
| <i>TPD52</i>    | -3.68                                                                                             | 8.38 E-05 | -6.25                                                                                          | 8.69 E-07 | -1.47                                                                                          | 4.66 E-03 | +1.12                                                                                        | 2.46 E-03 |
| <i>NOTCH2</i>   | -2.07                                                                                             | 8.84 E-04 | -2.43                                                                                          | 2.10 E-04 | -1.28                                                                                          | 2.63 E-02 | +1.72                                                                                        | 8.89 E-02 |
| <i>OSTM1</i>    | -1.71                                                                                             | 3.76 E-02 | -1.92                                                                                          | 5.48 E-03 | -1.53                                                                                          | 5.84 E-04 | +1.78                                                                                        | 3.84 E-03 |
| <i>BNIP3L</i>   | -1.78                                                                                             | 2.76 E-03 | -2.22                                                                                          | 1.85 E-03 | -1.35                                                                                          | 5.38 E-02 | +1.15                                                                                        | 2.01 E-01 |
| <i>JMJD6</i>    | -1.75                                                                                             | 3.96 E-03 | -1.58                                                                                          | 4.72 E-04 | -1.47                                                                                          | 3.88 E-03 | +1.66                                                                                        | 4.86 E-02 |
| <i>TLR6</i>     | -1.75                                                                                             | 1.31 E-02 | -1.61                                                                                          | 7.15 E-03 | -1.47                                                                                          | 1.30 E-02 | +1.15                                                                                        | 1.98 E-01 |
| <i>MAPK1</i>    | -1.77                                                                                             | 1.80 E-03 | -1.75                                                                                          | 3.27 E-04 | -1.42                                                                                          | 2.51 E-03 | +1.33                                                                                        | 1.69 E-02 |
| <i>EREG</i>     | -1.66                                                                                             | 3.54 E-02 | -2.70                                                                                          | 2.51 E-05 | -2.12                                                                                          | 1.31 E-04 | +1.61                                                                                        | 6.63 E-04 |
| <i>CCNB2</i>    | -1.6                                                                                              | 2.45 E-03 | -1.75                                                                                          | 2.81 E-03 | -1.23                                                                                          | 1.69 E-02 | +1.05                                                                                        | 1.27 E-01 |
| <i>CCL2</i>     | -1.59                                                                                             | 5.52 E-11 | -2.27                                                                                          | 1.00 E-04 | -1.40                                                                                          | 3.02 E-03 | +1.20                                                                                        | 3.39 E-02 |
| <i>IL18</i>     | -1.61                                                                                             | 3.78 E-04 | -1.26                                                                                          | 5.66 E-02 | +1.92                                                                                          | 5.34 E-02 | +1.23                                                                                        | 4.30 E-03 |
| <i>PTMS</i>     | +1.72                                                                                             | 1.62 E-03 | +1.58                                                                                          | 1.02 E-02 | +1.04                                                                                          | 3.73 E-01 | -1.25                                                                                        | 2.60 E-02 |
| <i>ATP6V1C1</i> | -1.75                                                                                             | 4.98 E-02 | -1.61                                                                                          | 1.90 E-03 | -1.35                                                                                          | 9.89 E-03 | +1.23                                                                                        | 1.18 E-01 |
| <i>B3GNT5</i>   | -1.87                                                                                             | 4.00 E-02 | -2.63                                                                                          | 4.42 E-05 | -2.12                                                                                          | 1.04 E-05 | +1.13                                                                                        | 3.63 E-01 |
| <i>LYAR</i>     | -1.87                                                                                             | 8.36 E-03 | -2.08                                                                                          | 4.17 E-04 | -1.92                                                                                          | 2.82 E-03 | +1.20                                                                                        | 2.73 E-01 |
| <i>MDM2</i>     | -1.62                                                                                             | 1.76 E-02 | -2.12                                                                                          | 2.47 E-02 | +1.01                                                                                          | 4.57 E-01 | +1.22                                                                                        | 2.42 E-01 |
| <i>RGS2</i>     | -1.53                                                                                             | 2.02 E-02 | -1.42                                                                                          | 5.26 E-04 | -1.11                                                                                          | 8.93 E-02 | +1.11                                                                                        | 2.59 E-01 |
