# Supplementary material
Source: PubMed Central journal article supplement (PMC4197879)
Supplement: embr0015-0686-sd5.pdf [file embr0015-0686-sd5.pdf]

**Table S2** Genes down-regulated upon depletion of DYRK1A and described in the literature as regulated by NF- $\kappa$ B.

| <b>Genes</b>   | <b>DYRK1A depletion (Fold change)</b> | <b>p-value</b> | <b>Ref. to regulation by NF-<math>\kappa</math>B</b> |
|----------------|---------------------------------------|----------------|------------------------------------------------------|
| <i>IL6</i>     | -3.64                                 | 3.01E-04       | [1]                                                  |
| <i>TNFAIP6</i> | -2.87                                 | 4.04E-03       | [2]                                                  |
| <i>CXCL1</i>   | -2.77                                 | 1.77E-04       | [3]                                                  |
| <i>IL7R</i>    | -2.59                                 | 2.64E-03       | [4]                                                  |
| <i>IL8</i>     | -2.04                                 | 7.20E-03       | [2]                                                  |
| <i>BIRC3</i>   | -2.02                                 | 5.58E-03       | [5]                                                  |
| <i>CXCL2</i>   | -2.01                                 | 2.35E-02       | [3]                                                  |
| <i>F3</i>      | -1.94                                 | 2.60E-02       | [6]                                                  |
| <i>TPMT</i>    | -1.82                                 | 6.26E-03       | [7]                                                  |
| <i>SDC4</i>    | -1.80                                 | 2.29E-02       | [8]                                                  |
| <i>TGM2</i>    | -1.77                                 | 2.90E-03       | [9]                                                  |
| <i>VEGFC</i>   | -1.76                                 | 9.08E-07       | [10]                                                 |
| <i>IFI44</i>   | -1.69                                 | 1.10E-02       | [11]                                                 |
| <i>IER3</i>    | -1.68                                 | 4.62E-03       | [12]                                                 |
| <i>IL1A</i>    | -1.68                                 | 1.98E-03       | [13]                                                 |
| <i>TNFAIP8</i> | -1.57                                 | 1.45E-02       | [14]                                                 |
