# Supplementary material
Source: PubMed Central journal article supplement (PMC4197879)
Supplement: embr0015-0686-sd6.pdf [file embr0015-0686-sd6.pdf]

### Table S3

#### qPCR primers

|                 |                            |
|-----------------|----------------------------|
| DYRK1A-F:       | ATCGACATGTGGTCCCTTGGATGT   |
| DYRK1A-R:       | TGGGATGCCCAAGACTTCCACTAT   |
| RLP0-F:         | AGGTGTTGACAATGGCAGCAT      |
| RLP0-R:         | TGCAGACAGACACTGGCAACAT     |
| IL8-F:          | CCACACTGCGCCAACACAGAAATTA  |
| IL8-R:          | AAACTTCTCCACAACCCTCTGCAC   |
| TNF-F:          | GCCCATGTTGTAGCAAACCCTCAA   |
| TNF-R:          | AGTAGATGAGGTACAGGCCCTCTGAT |
| TGF $\beta$ -F: | ATGAACCGGCCTTTCCTGCTTC     |
| TGF $\beta$ -R: | AAGCAATAGTTGGTGTCCAGGGCT   |
| CCL13-F:        | ACGTCCCATCTACTTGCTGCTTCA   |
| CCL13-R:        | ACTTCTCCTTTGGGTCAGCACAGA   |
| FAS-F:          | GAACACTGTGACCCTTGCACCAAA   |
| FAS-R:          | TCTTTGCACTTGGTGTGCTGGTG    |
| CHUK-F:         | ACAGTGACAGCACAGAGATGGTGA   |
| CHUK-R:         | ATTACTGAGGGCCACTTCCACCTT   |
| PTMS-F:         | GCAAGCCGGAAAGAGCGAAAGAAA   |
| PTMS-R:         | GGCCCTTCATCATCCTCTTCTTCT   |
| MICB-F:         | TGACAGAGAATGGGCAAGACCTCA   |
| MICB-R:         | TGGTGCTGCTGTCTTCATGGATCT   |
| CXCL1-F:        | GGAAAGCTTGCCTCAATCCTGCAT   |
| CXCL1-R:        | TCCTCCCTTCTGGTCAGTTGGATT   |
| CXCL2-F:        | TAGCCACACTCAAGAATGGGCAGA   |
| CXCL2-R:        | TGCAGCTGTGTCTCTCTTTCTCT    |
| BGNT5-F:        | GCCCAAGATTTAAAGCCCGCAAGT   |
| BGNT5-R:        | TCATGCGGCTCTCCCATGTGAATA   |

LYAR-F: GCCTTTCTTGCATTGACTGCGGTA  
LYAR-R: TGCTGTTTGATGTCGCCTTTGTGG

EREG-F: AGGCAGTCCTCAGTACAACACTGTGA  
EREG-R: ACTTGAGCCACACGTGGATTGTCT

ATP6V1C1-F: ACCACTTGTACGGTGGCTGAAAGT  
ATP6V1C1-R: AGCATTGCTTGGAAGTTCCTGCGC

RGS2-F: CGAGGAGAAGCGAGAAAAGA  
RGS2-R: TTCCTCAGGAGAAGGCTTGA

IFI44-F: GCATGTAACGCATCAGGCTTTGGT  
IFI44-R: ACGGCAGGTATTTGCCATCTTTCC

IL18-F: GCTTGAATCTAAATTATCAGTC  
IL18-R: GAAGATTCAAATTGCATCTTAT

IL1a-F: TAGCAACCAACGGGAAGGTTCTGA  
IL1a-R: AAGGTGCTGACCTAGGCTTGATGA

IL7R-F: TCGGGAAGGAGCCAATGACTTTGT  
IL7R-R: TCTCTGCAGGAGTGTCAGCTTTGT

IL6-F: GGTACATCCTCGACGGCATCT  
IL6-R: GTGCCTCTTTGCTGCTTTCAC

BNIP3L-F: TTCGCCACAAGAAGATGGGCAGAT  
BNIP3L-R: AGTGGAACCTCCTGGGTGGAATGT

CCL2-F: TCGCTCAGCCAGATGCAATCAATG  
CCL2-R: TGGAATCCTGAACCCACTTCTGCT

CCNB2-F: TCGACCCTTGCCACTACACTTCTT  
CCNB2-R: ACCTTCTGAGACAAGCAGGAAGCA

JMJD6-F: TATGGCACAAGACGGTAAGAGGGA  
JMJD6-R: AAGCTATCCCTGTGGACTCCTGAA

MAPK1-F: ATTCCAAGGGCTACACCAAGTCCA  
MAPK1-R: TTCCCTGGAAAGATGGGCCTGTTA

NOTCH-F: GTGCCATGGCCAATAGCAATCCTT  
 NOTCH-R: AACGAGGTCCTGCATAACCCTTCA  
  
 OSTM1-F: TCAGAGAGTCAGAGTTGTGCCAGA  
 OSTM1-R: ATGTTCAAAGCAGGTCAGGGTGTG  
  
 TLR6-F: ACCCATCGGCTGATTTCTTCCAGA  
 TLR6-R: AATCAGGCCAGCCCTCTAACACTT  
  
 TNFIP6-F: TCATGTCTGTGCTGCTGGATGGAT  
 TNFIP6-R: TGGATCTGTAAAGACGCCACCACA  
  
 TPD52-F: AACATTGCCAAAGGGTGGCAAGAC  
 TPD52-R: TGTCCAGCCTGGGATAAGGTTTCA  
  
 MDM2-F: GGAGCAGGCAAATGTGCAATACCA  
 MDM2-R: TTCCGAAGCTGGAATCTGTGAGGT  
  
 HP1 $\alpha$ -F: AACAGTGCCGATGACATCAAA  
 HP1 $\alpha$ -R: GCCCAATGATCTTTTCTGGT  
  
 HP1 $\beta$ -F: GCCGGAGCGGATTATTGGAG  
 HP1 $\beta$ -R: GTGGGCACTTGACATTGGC  
  
 HP1 $\gamma$ -F: TGCCAGAGGTCTTGATCCTGA  
 HP1 $\gamma$ -R: TCTTTCGCCAGCACCAAGTCT

### Primers for ChIP analysis

IL8-PP-F: AAGAAAACCTTTCGTCATACTCCG  
 IL8-PP-R: TGGCTTTTTATATCATCACCCCTAC  
  
 TNF $\alpha$ -PP-F: AAACACAGGCCTCAGGACTCAACA  
 TNF $\alpha$ -PP-R: ACCAGGTCTGTGGTCTGTTTCCTT  
  
 TGF $\beta$ -PP-F: ATGGCACCGCTTCTGTCCTTTCTA  
 TGF $\beta$ -PP-R: TAAGCAGCCTCCTGTCACTCAACA  
  
 IL1a-PP-F: AGGAGCTGCCAAGTATTCTGCCAA  
 IL1a-PP-R: AGGGAAGCGCGGGAAACTTATCAA  
  
 IL6-PP-F: TTGTGGGATTACTATGCGCCAGGA

IL6-PP-R: TGTTACATCAAGGACCTGTGCCCT  
IL7R-PP-F: GCTGAGGCAGGAGAATTGCTTGAA  
IL7R-PP-R: TGTTGCCCAGGCTGGAGTACAATA  
IFI44-PP-F: GCTGGATCAGCTTATGCTCCTTTGT  
IFI44-PP-R: AGGAAACTGAAACTCAGTGTGCCAG  
TNFIP6-PP-F: TCATGTCTGTGCTGCTGGATGGAT  
TNFIP6-PP-R: TGGATCTGTAAAGACGCCACCACA

### Primers for mutagenesis

H3T45E s: CGCTACAGGCCAGGGGAAGTAGCTCTGAGAGAGATCCG  
H3T45E as: CGGATCTCTCTCAGAGCTACTTCCCCTGGCCTGTAGCG  
H3S57A s: CGTCGTTACCAGAAAGCGACTGAGCTGCTCATCCGGA  
H3S57A as: TCCGGATGAGCAGCTCAGTCGCTTTCTGGTAACGACG  
H3S57E s: CGTCGTTACCAGAAAGAGACTGAGCTGCTCATCCGGA  
H3S57E as: TCCGGATGAGCAGCTCAGTCTCTTTCTGGTAACGACG  
DYRK1A V15A s: CAAACCTTCATCTGCCCGGCTCGCACCGT  
DYRK1A V15A as: ACGGTGCGAGCCGGGCAGATGAAGGTTTG  
DYRK1A V75A s: GTGATGCCTGACATTGCCATGTTACAGAGGCGG  
DYRK1A V75A as: CCGCCTCTGTAACATGGCAATGTCAGGCATCAC  
DYRK1A V332A s: TCGGTCTCCAGAGGCGCTACTGGGAATGC  
DYRK1AV332Aas: GCATTCCCAGTAGCGCCTCTGGAGACCGA
