# Supplementary material
Source: PubMed Central journal article supplement (PMC4197879)
Supplement: embr0015-0686-sd7.pdf [file embr0015-0686-sd7.pdf]

## **Supplementary Material and Methods**

### ***Cell culture***

HeLa, HEK293, and NIH3T3 cells were cultured in Dulbecco's modified Eagle's medium (DMEM, Gibco) with 10% fetal bovine serum (FBS) with 100 U/ml penicillin-streptomycin and incubated at 37°C with 7% CO<sub>2</sub>. CMK (purchased from DSMZ cell collection) and HL60 cells were cultured in RPMI-1640 (Gibco) with 20% fetal bovine serum and 100 U/mL penicillin-streptomycin and incubated at 37°C with 7% CO<sub>2</sub>. Leucettine L41 was kindly provided by L Meijer [15,16].

### ***Generation of inducible DYRK1A-expressing HEK293 cells***

The cDNAs coding for either DYRK1A (WT) or the kinase-dead mutant of DYRK1A(K188R) were inserted into the pi-tk-hygro vector for retroviral delivery [17]. Two days after transfection using FuGENE (Promega E2311), the medium of the packaging HEK293 cells was filtered with a 0.45-µm filter (Millipore) and supplemented with polybrene (AL-118, Sigma) at 100 µg/ml. This medium was used to infect host HEK293 cells (three consecutive infections), followed by selection with hygromycin (H3274, Sigma) at a final concentration of 100 µg/ml.

### ***Ethics Statement***

Immunisation of rabbits was carried out by Eurogentec SA, Seraing. All animals used in the protocol were handled in strict accordance with good animal practices within the local jurisdiction (the Belgian national animal welfare regulations). Rabbit immunisation work at Eurogentec has approval from the ethics committee of the Centre d'Economie Rurale (CER Groupe, Marloie, Belgium).

### ***Immunofluorescence and image acquisition***

Transient transcription with a construct encoding GFP-DYRK1A-FLAG was performed using FuGENE HD (Promega E2311) reagent as recommended by the manufacturer. Immunofluorescent labeling was performed in NIH3T3 cells after transient transfection for 48 hours in culture. Cells were fixed with PBS-3.7% paraformaldehyde at room temperature (RT) for 10 min, then permeabilized with PBS-triton 0.5% at RT for 15 min, and incubated with primary antibodies at 4°C overnight. Next, coverslips were washed three times in PBS-BSA 0.5% (w/v) followed by 1h incubation with secondary antibodies at room temperature while protected from light. Then they were washed three times in PBS-BSA 0.5% (w/v), and once in PBS, before final staining with DAPI. Imaging was conducted on an Axiovert 200M microscope (Zeiss) coupled with an Apotome with Axiovision 4.7 (Zeiss).

### ***In vitro interaction experiments***

GST-HP1 fusions, GST- $\Delta$ Brg1 (1223–1420), and GST-DYRK1A constructs were described previously [18,19]. B10-tagged histone H3 was constructed in pET15b plasmids that also provided a 6x His affinity tag used for purification. Pull-down assays were performed in ELB buffer (HEPES pH 7, 250 mM NaCl, 1 mM EDTA, 0.1% NP40, 1x Complete protease inhibitor cocktail from Roche). Bound proteins were eluted in 100 mM Tris pH 8 with 20 mM glutathione, resolved by SDS-PAGE, and detected by western blotting using the B10 monoclonal mouse anti-estrogen receptor  $\alpha$  antibodies (Euromedex ERB10-As) or anti-histone H3 rabbit polyclonal antibodies (ab1791 abcam).

### ***In vitro kinase assays***

GST or GST-DYRK1A were incubated in phosphorylation buffer (25 mM Hepes pH 6.8, 10 mM MgCl<sub>2</sub>, 0.5 mM DTT, 200 μM ATT, 1x Complete protease inhibitor cocktail from Roche, 1% BSA) with rH3(25–66) and rH3 (Biolabs M2507S) in a total volume of 15 μl for 30 minutes with shaking at room temperature.

### ***Depletion of DYRK1A by siRNA***

The following siRNA were synthesized by Dharmacon (ON-TARGET plus): siDYRK1A-05 (J-004805-05), siDYRK1A-06 (J-004805-06), non-targeted siNT (D-001810-01), siHP1α (5-CACAAAUUGUGAUAGCAUU-3), siHP1β (5-AGCUCAUGUCCUGAUGAA-3), and siHP1γ (5-AUCUGACAGUGAAUCUGAU-3). siRNA were transfected into HeLa cells at a final concentration of 50 nM using DharmaFECT1 (T-2001). Cells were harvested three days after transfection. RNA was extracted using the High Pure RNA Isolation Kit (Roche Ref: 11 828 665 001). Levels of mRNA were quantified by real-time PCR after reverse transcription with 200u of M-MLV reverse transcriptase according to the manufacturer's recommendations (Invitrogen). Proteins were extracted with 8 M urea and detected by western blotting using anti-DYRK1A (Sigma ref: WH0001859M1), anti-HP1α (2G9), HP1β (1A9), and HP1γ (1G6) from Euromedex.

### ***Human exon array data analysis***

Microarray dataset analysis and visualization were made using EASANA® (GenoSplice technology), which is based on the GenoSplice's FAST DB® annotations [18]. For this analysis, we conducted an unpaired Student *t* test to compare gene intensities between HeLa cells transfected with non-targeted siRNA and HeLa cells transfected with an

siRNA targeting DYRK1A mRNA. Genes were considered significantly differentially expressed when fold change was  $\geq 1.5$  and  $P \leq 0.05$  (unadjusted  $P$ ). Gene Ontology analysis of genes affected by depletion of DYRK1A was performed using PANTHER tools (<http://www.pantherdb.org> and [21]). Genes regulated by both DYRK1A and NF $\kappa$ -B and listed in Table S2 were selected by crossing the hits from the DYRK1A depletion arrays with data from an on-line resource providing a list of NF $\kappa$ -B genes (<http://bioinfo.lifl.fr/NF-KB/>).

### ***Chromatin immunoprecipitation (ChIP)***

ChIP was performed essentially as previously described [22], with minor alterations. HeLa cells were cross-linked in phosphate-buffered saline (PBS) containing 1% formaldehyde (Sigma) for 10 min at room temperature. The crosslinking reaction was quenched with PBS containing 125 mM glycine, followed by three washes with ice-cold PBS. The chromatin was fragmented by sonication, to produce average DNA lengths of 0.5 kb. Then, chromatin was immunoprecipitated with anti-histone-modification antibodies (ab1791, ab8898, ab26127, H3pS57, 1H5, ab40828, 42s2, 2E12, and WH0001859M1). After ChIP, the eluted DNAs were detected by qPCR using the primers listed in Table S3. Levels of histone modification are expressed as % of H3, and levels of other proteins are expressed relative to the signal obtained for ChIP using non-immune IgGs. Values are averaged from three independent experiments.

## References

1. Libermann TA, Baltimore D. Activation of interleukin-6 gene expression through the NF-kappa B transcription factor. *Mol Cell Biol.* 1990 May;10(5):2327–34.
2. Dryden NH, Sperone A, Martin-Almedina S, Hannah RL, Birdsey GM, Khan ST, et al. The transcription factor Erg controls endothelial cell quiescence by repressing activity of nuclear factor (NF)-kappa B p65. *J Biol Chem.* 2012 Apr 6;287(15):12331–42.
3. Bachmeier BE, Mohrenz IV, Mirisola V, Schleicher E, Romeo F, Höhneke C, et al. Curcumin downregulates the inflammatory cytokines CXCL1 and -2 in breast cancer cells via NFkappaB. *Carcinogenesis.* 2008 Apr;29(4):779–89.
4. Tian B, Nowak DE, Jamaluddin M, Wang S, Brasier AR. Identification of direct genomic targets downstream of the nuclear factor-kappaB transcription factor mediating tumor necrosis factor signaling. *J Biol Chem.* 2005 Apr 29;280(17):17435–48.
5. Lee ST, Li Z, Wu Z, Aau M, Guan P, Karuturi RKM, et al. Context-specific regulation of NF-kappa B target gene expression by EZH2 in breast cancers. *Mol Cell.* 2011 Sep 2;43(5):798–810.
6. Mackman N, Brand K, Edgington TS. Lipopolysaccharide-mediated transcriptional activation of the human tissue factor gene in THP-1 monocytic cells requires both activator protein 1 and nuclear factor kappa B binding sites. *J. Exp. Med.* 1991 Dec 1;174(6):1517–26.
7. Hinz M, Lemke P, Anagnostopoulos I, Hacker C, Krappmann D, Mathas S, et al. Nuclear factor kappaB-dependent gene expression profiling of Hodgkin's disease tumor cells, pathogenetic significance, and link to constitutive signal transducer and activator of transcription 5a activity. *J. Exp. Med. Rockefeller Univ Press;* 2002;196(5):605–17.
8. Zhang Y, Pasparakis M, Kollias G, Simons M. Myocyte-dependent regulation of endothelial cell syndecan-4 expression. Role of TNF-alpha. *J Biol Chem.* 1999 May 21;274(21):14786–90.
9. Chen C-S, Wu C-H, Lai Y-C, Lee W-S, Chen H-M, Chen R-J, et al. NF-kappaB-activated tissue transglutaminase is involved in ethanol-induced hepatic injury and the possible role of propolis in preventing fibrogenesis. *Toxicology.* 2008 Apr 18;246(2-3):148–57.
10. Chilov D, Kukk E, Taira S, Jeltsch M, Kaukonen J, Palotie A, et al. Genomic organization of human and mouse genes for vascular endothelial growth factor C. *J Biol Chem.* 1997 Oct 3;272(40):25176–83.

11. Buerki C, Rothgiesser KM, Valovka T, Owen HR, Rehrauer H, Fey M, et al. Functional relevance of novel p300-mediated lysine 314 and 315 acetylation of RelA/p65. *Nucleic Acids Res.* 2008 Mar;36(5):1665–80.
12. Schäfer H, Diebel J, Arlt A, Trauzold A, Schmidt WE. The promoter of human p22/PACAP response gene 1 (PRG1) contains functional binding sites for the p53 tumor suppressor and for NFkappaB. *FEBS LETTERS.* 1998 Oct 2;436(2):139–43.
13. Mori N, Prager D. Transactivation of the interleukin-1alpha promoter by human T-cell leukemia virus type I and type II Tax proteins. *Blood.* 1996 Apr 15;87(8):3410–7.
14. You Z, Ouyang H, Lopatin D, Polver PJ, Wang CY. Nuclear factor-kappa B-inducible death effector domain-containing protein suppresses tumor necrosis factor-mediated apoptosis by inhibiting caspase-8 activity. *J Biol Chem.* 2001 Jul 13;276(28):26398–404.
15. Debdab M, Carreaux F, Renault S, Soundararajan M, Fedorov O, Filippakopoulos P, et al. (2011) Leucettines, a Class of Potent Inhibitors of cdc2-Like Kinases and Dual Specificity, Tyrosine Phosphorylation Regulated Kinases Derived from the Marine Sponge Leucettamine B: Modulation of Alternative Pre-RNA Splicing. *J. Med. Chem.* 54: 4172–86.
16. Tahtouh T, Elkins JM, Filippakopoulos P, Soundararajan M, Burgy G, Durieu E, et al. (2012) Selectivity, Cocrystal Structures, and Neuroprotective Properties of Leucettines, a Family of Protein Kinase Inhibitors Derived from the Marine Sponge Alkaloid Leucettamine B. *J. Med. Chem.* 55: 9312–30.
17. Stolarov J, Chang K, Reiner A, Rodgers L, Hannon GJ, Wigler MH, et al. Design of a retroviral-mediated ecdysone-inducible system and its application to the expression profiling of the PTEN tumor suppressor. *Proc Natl Acad Sci U S A.* 2001 Nov 6;98(23):13043–8.
18. Kentrup H, Becker W, Heukelbach J, Wilmes A, Schürmann A, Huppertz C, et al. Dyrk, a dual specificity protein kinase with unique structural features whose activity is dependent on tyrosine residues between subdomains VII and VIII. *J Biol Chem.* 1996 Feb 16;271(7):3488–95.
19. Lavigne M, Eskeland R, Azebi S, Saint-André V, Jang SM, Batsché E, et al. Interaction of HP1 and Brg1/Brm with the globular domain of histone H3 is required for HP1-mediated repression. *PLoS Genet.* 2009 Dec;5(12):e1000769.
20. la Grange de P, Dutertre M, Martin N, Auboeuf D. FAST DB: a website resource for the study of the expression regulation of human gene products. *Nucleic Acids Res.* 2005;33(13):4276–84.

21. Mi H, Muruganujan A, Casagrande JT, Thomas PD. Large-scale gene function analysis with the PANTHER classification system. *Nat Protoc.* 2013 Jul 18;8(8):1551–66.
22. del Arroyo AG, Messaoudi El S, Clark PA, James M, Stott F, Bracken A, et al. E2F-dependent induction of p14ARF during cell cycle re-entry in human T cells. *Cell Cycle.* 2007 Nov 1;6(21):2697–705.
