# Supplementary material
Source: PubMed Central journal article supplement (PMC4197879)
Supplement: embr0015-0686-sd9.pdf [file embr0015-0686-sd9.pdf]

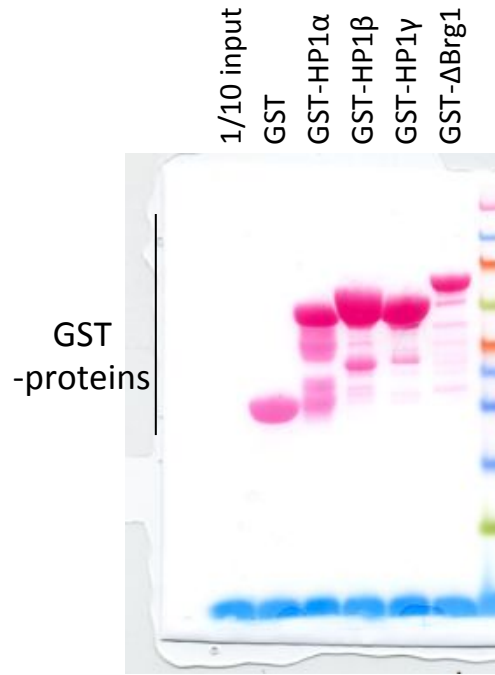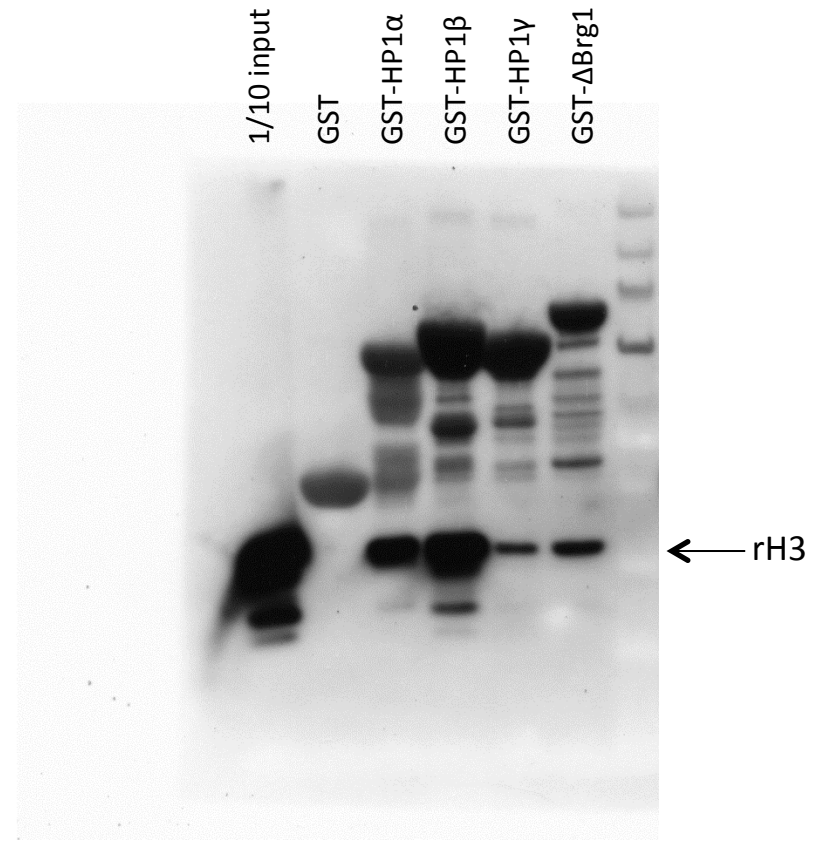

Fig 1B

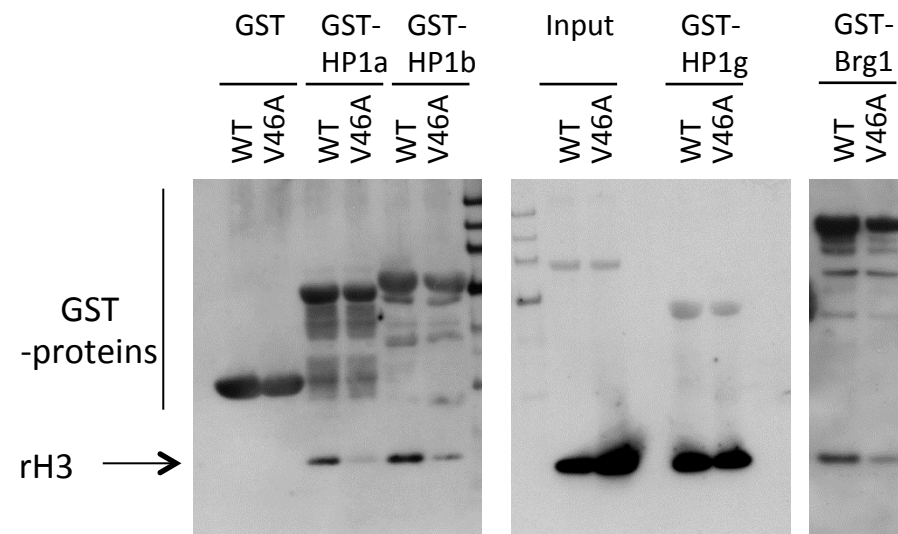

Fig 1C lanes 1 and 2

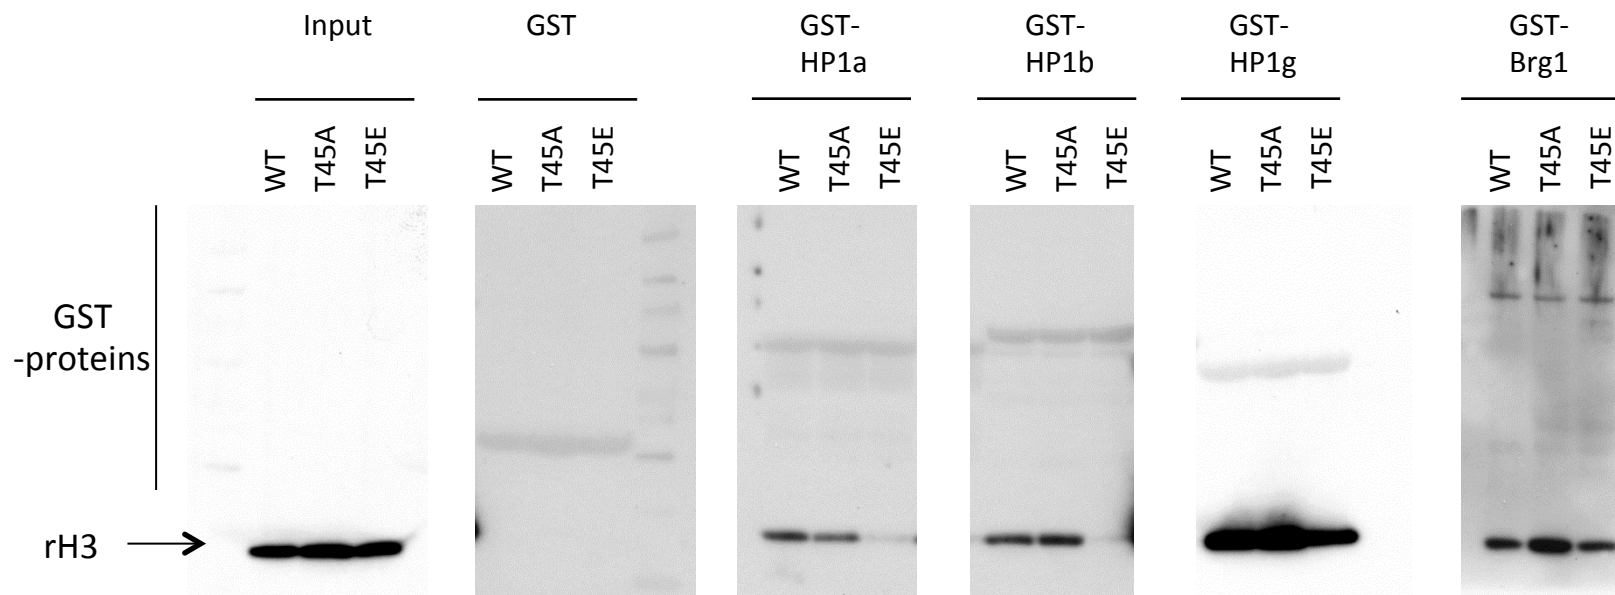

Fig 1C lanes 3, 4, and 5

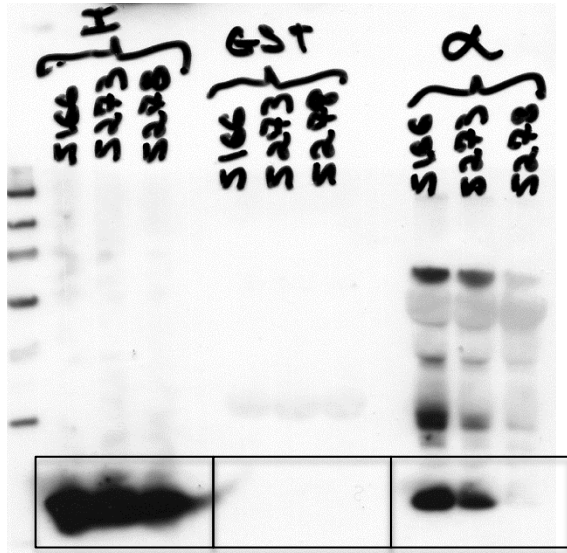

Input

GST

GST-  
HP1a

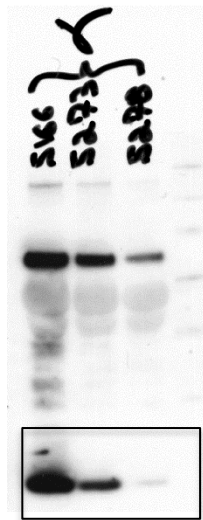

GST-  
HP1g

Binding of the indicated GST fusions to rH3(25-66) WT, S57E, and T45E-S57E

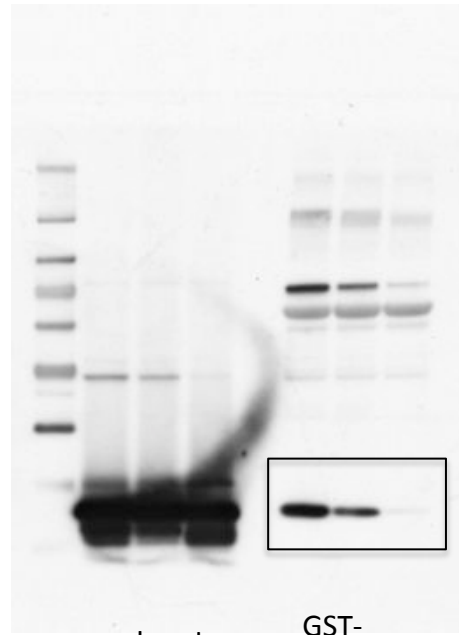

Input

GST-  
HP1b

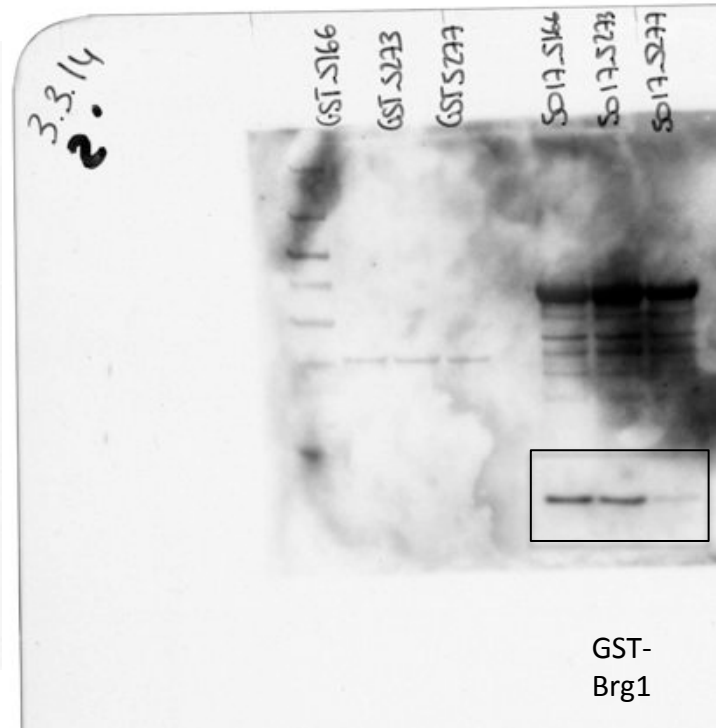

GST-  
Brg1

Fig 1C lanes 6, 7, and 8
