# Supplementary material
Source: PubMed Central journal article supplement (PMC4197879)
Supplement: embr0015-0686-sd10.pdf [file embr0015-0686-sd10.pdf]

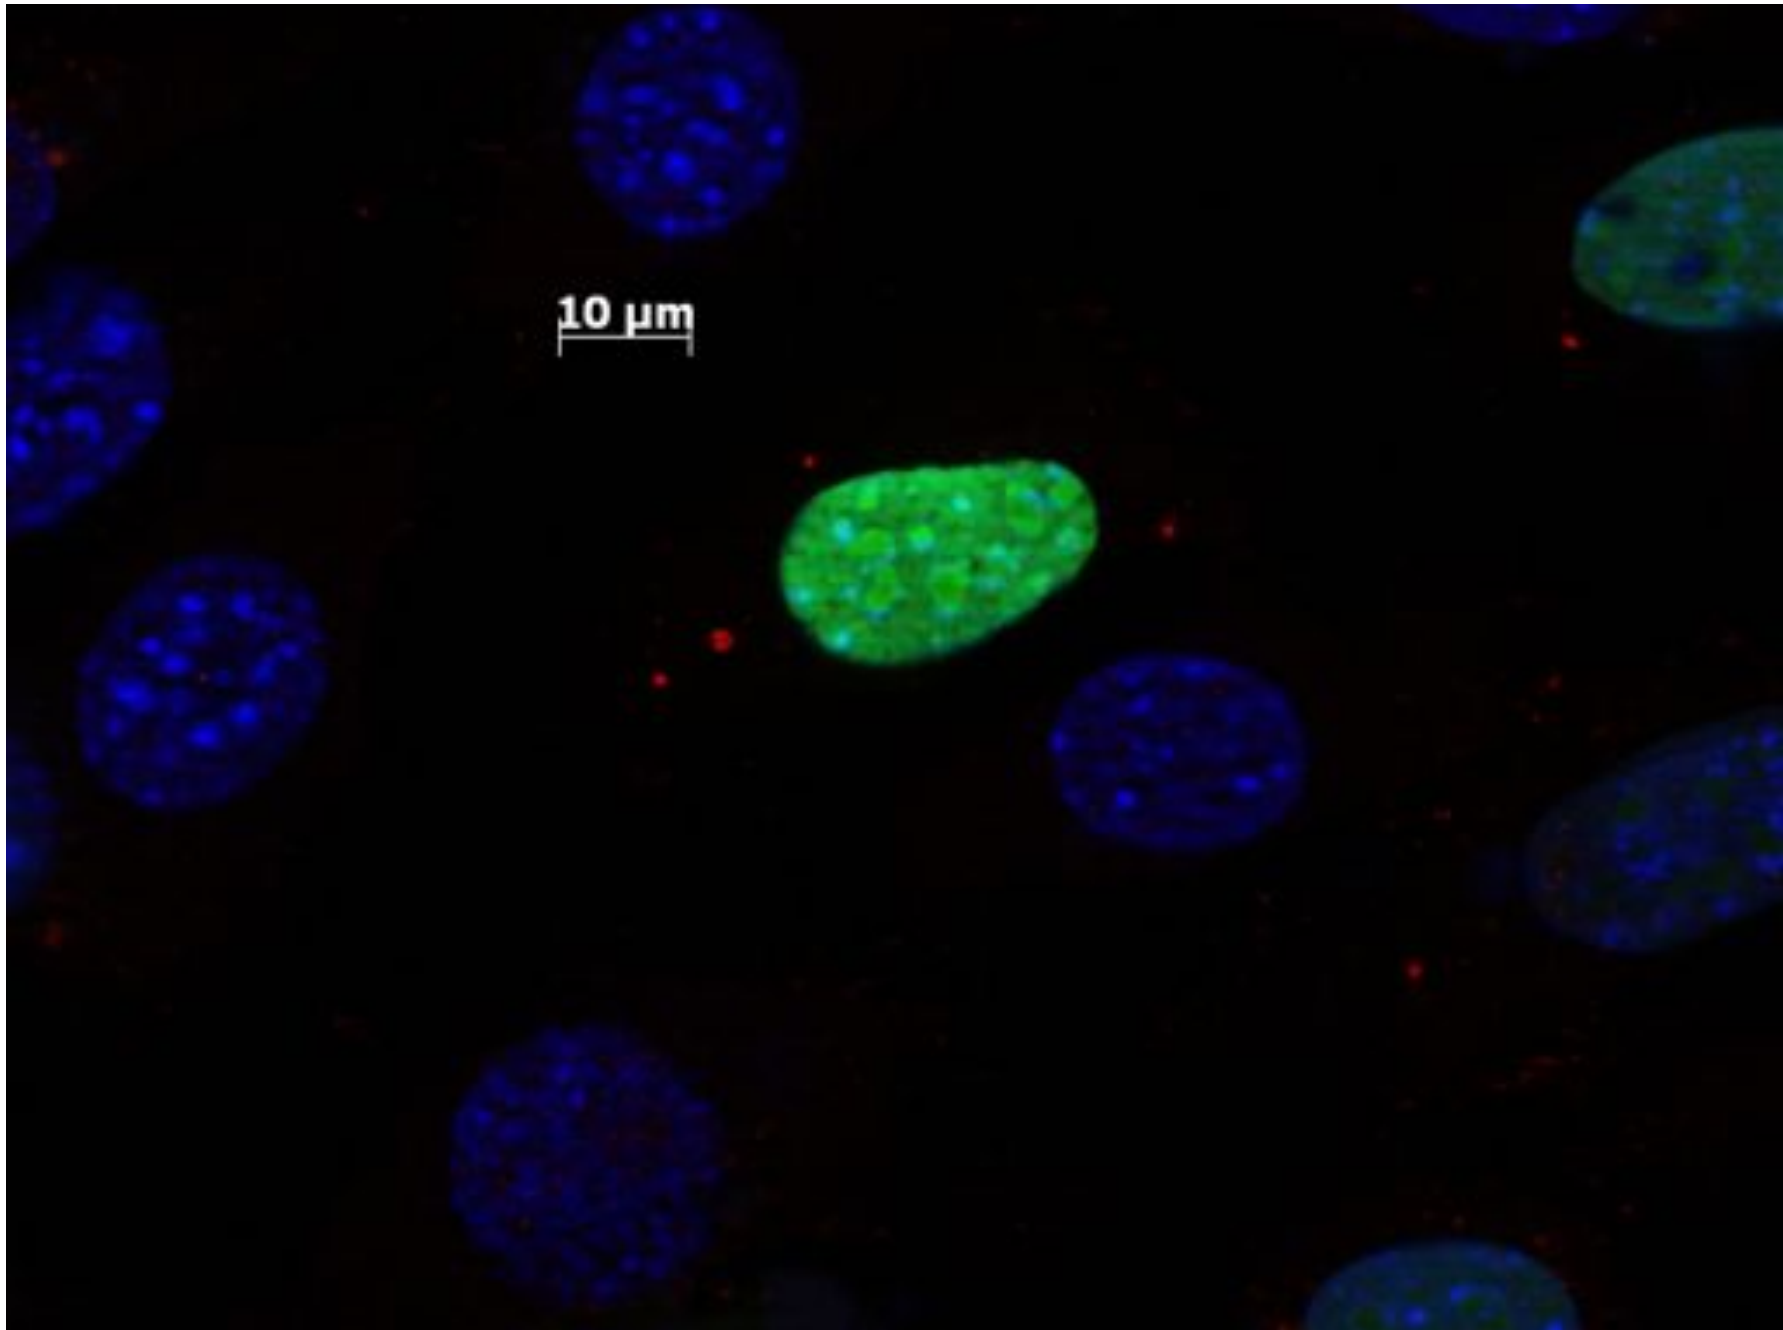

**Fig 2A top panels (H1)**

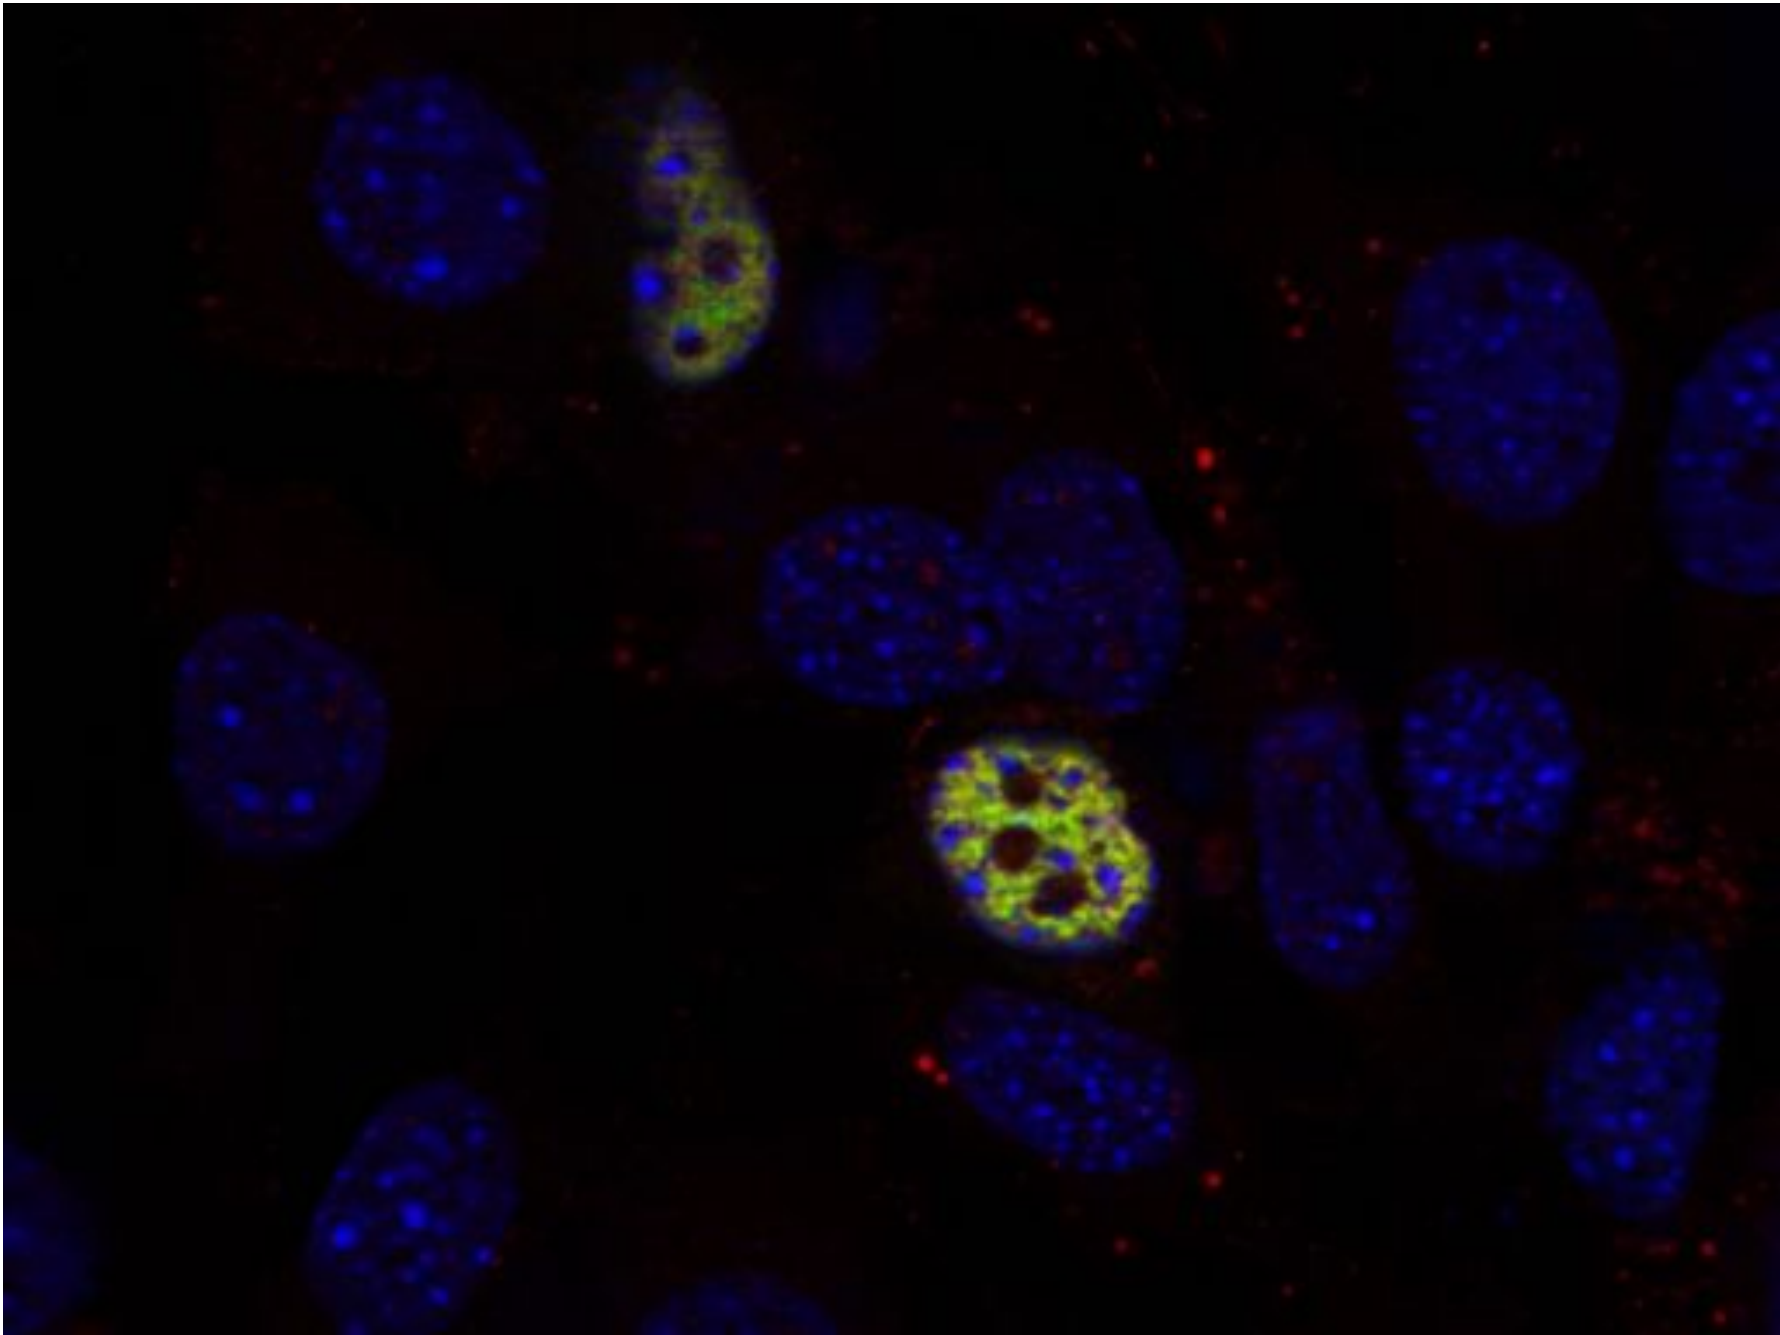

**Fig 2A middle panels (DYRK1A)**

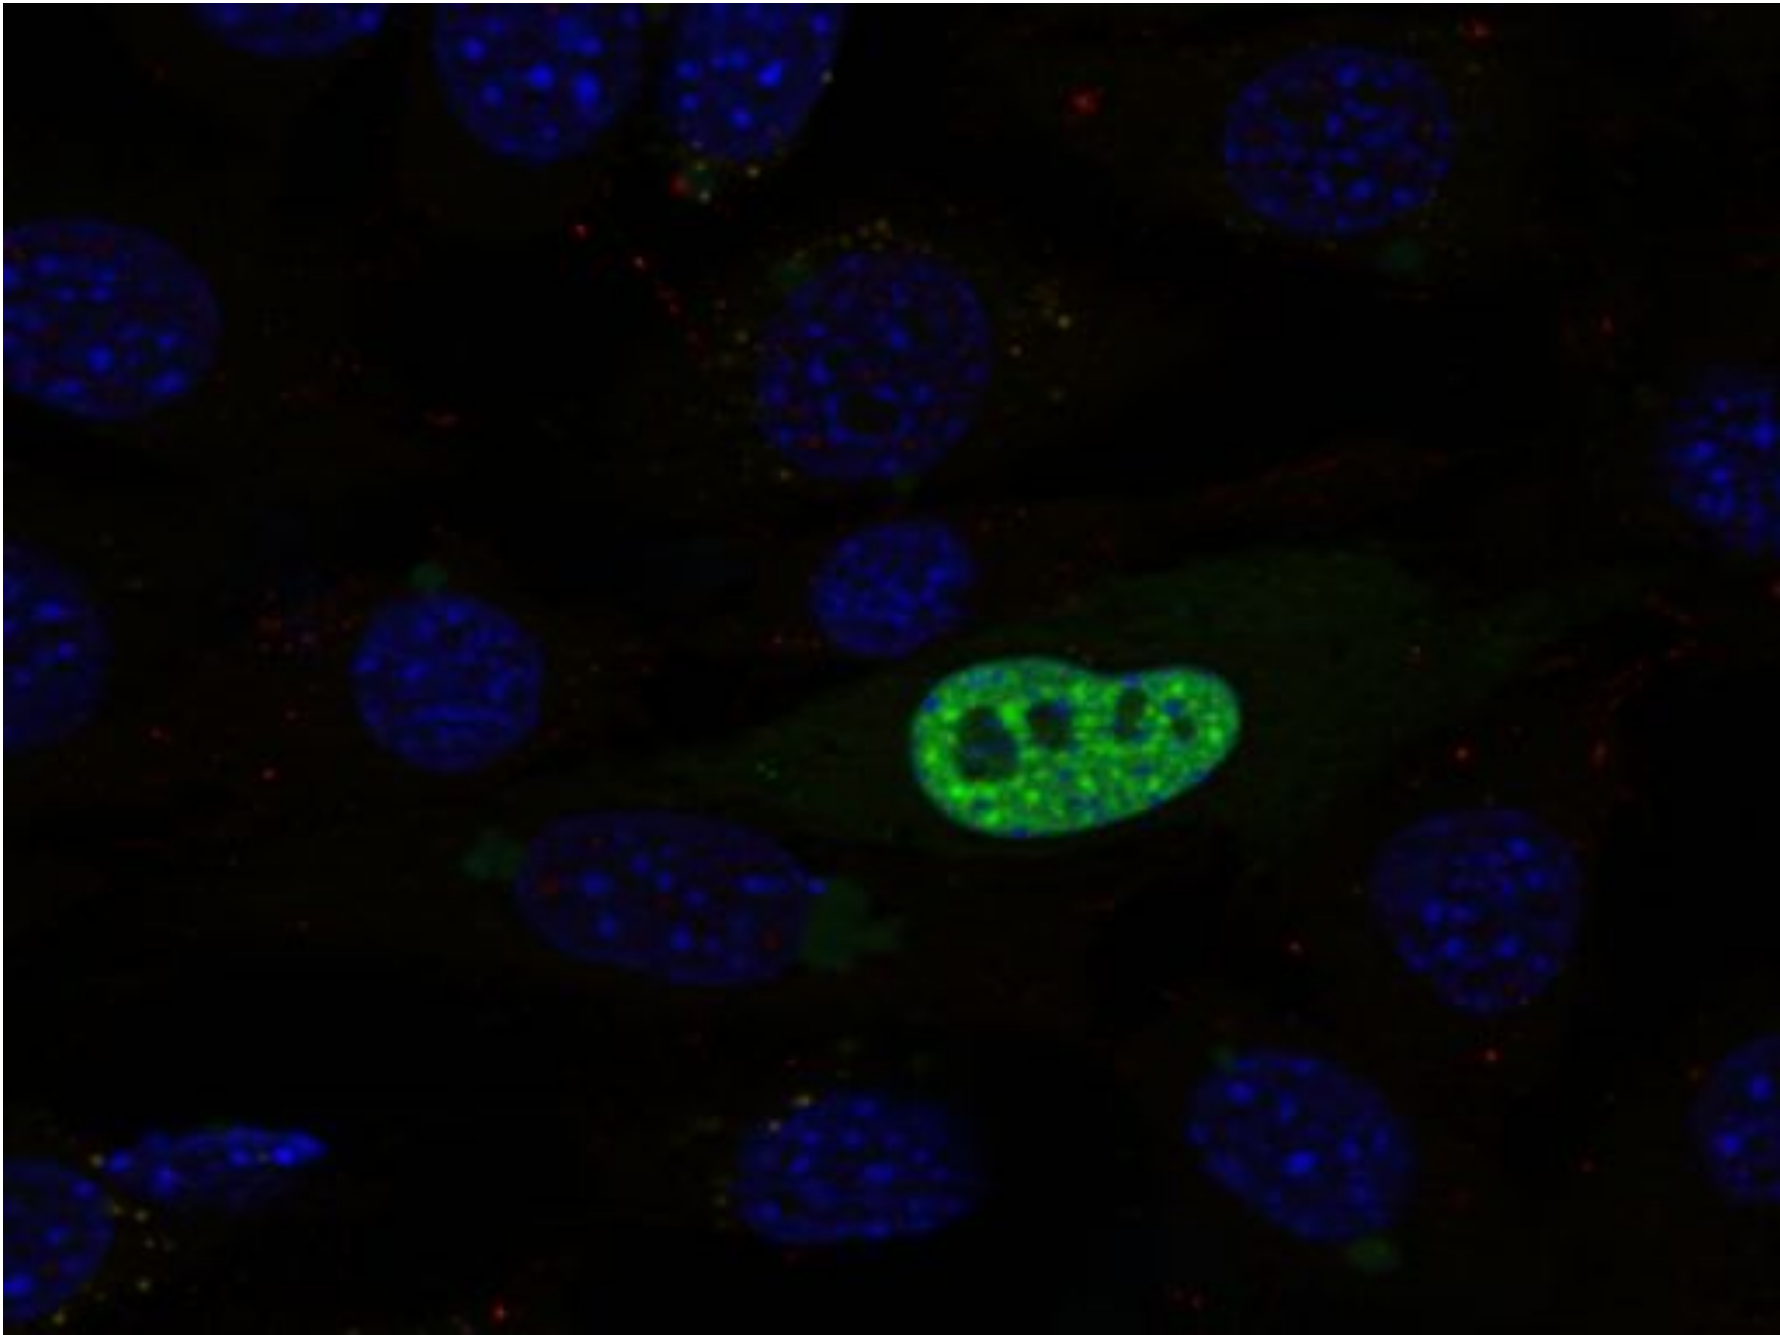

**Fig 2A Bottom panels (DYRK1A(K188R))**

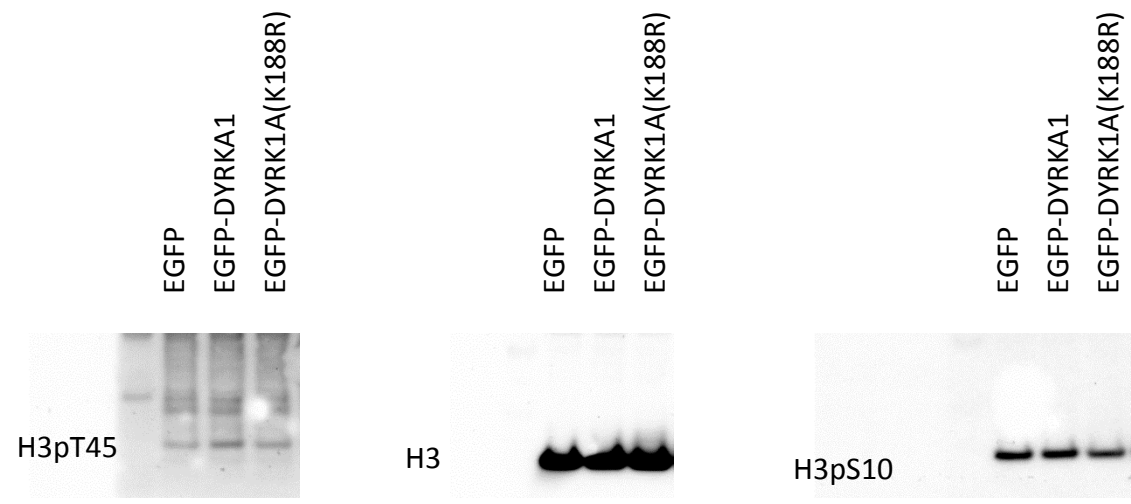

**Fig 2B**

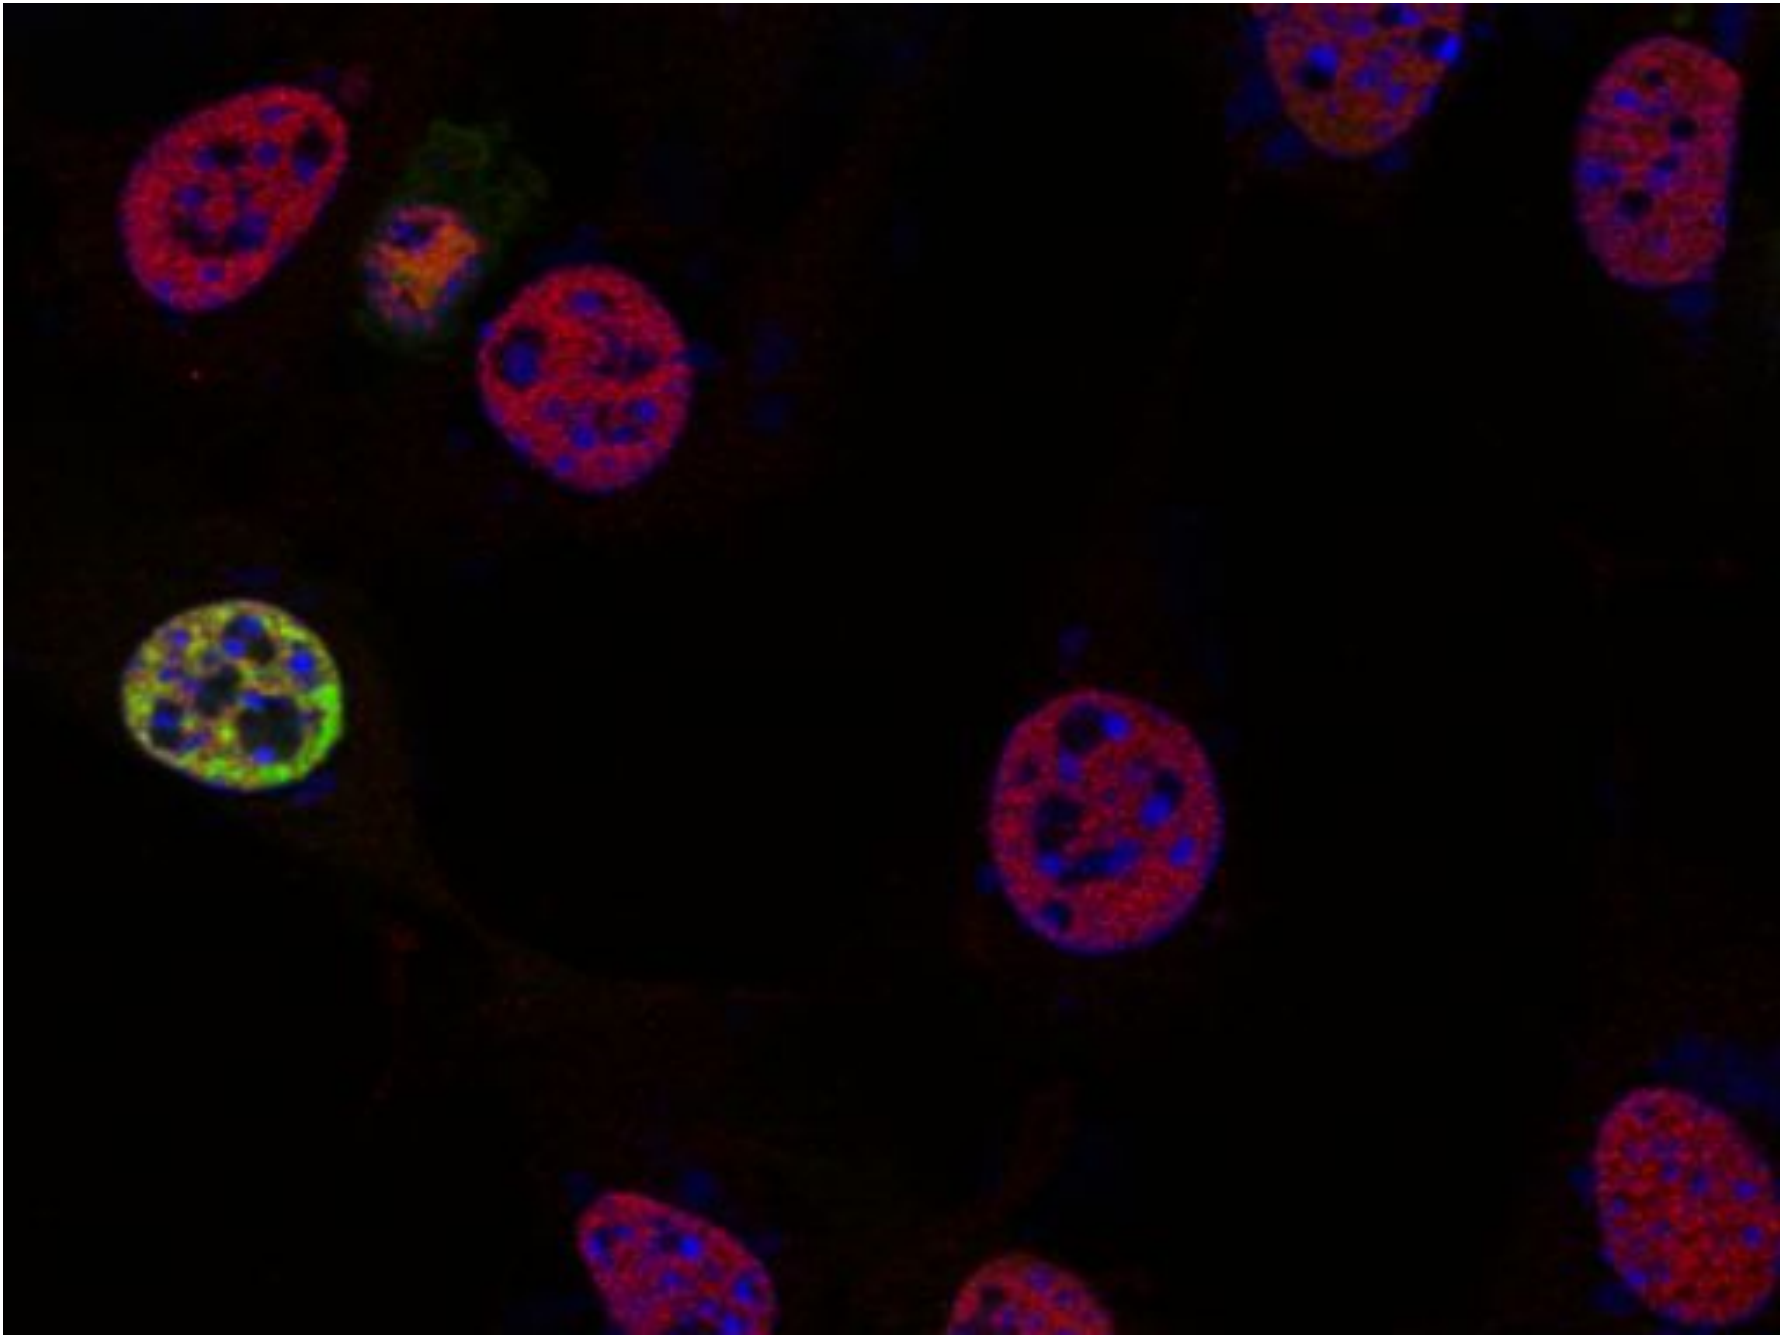

**Fig 2C Top panels (DYRK1A)**

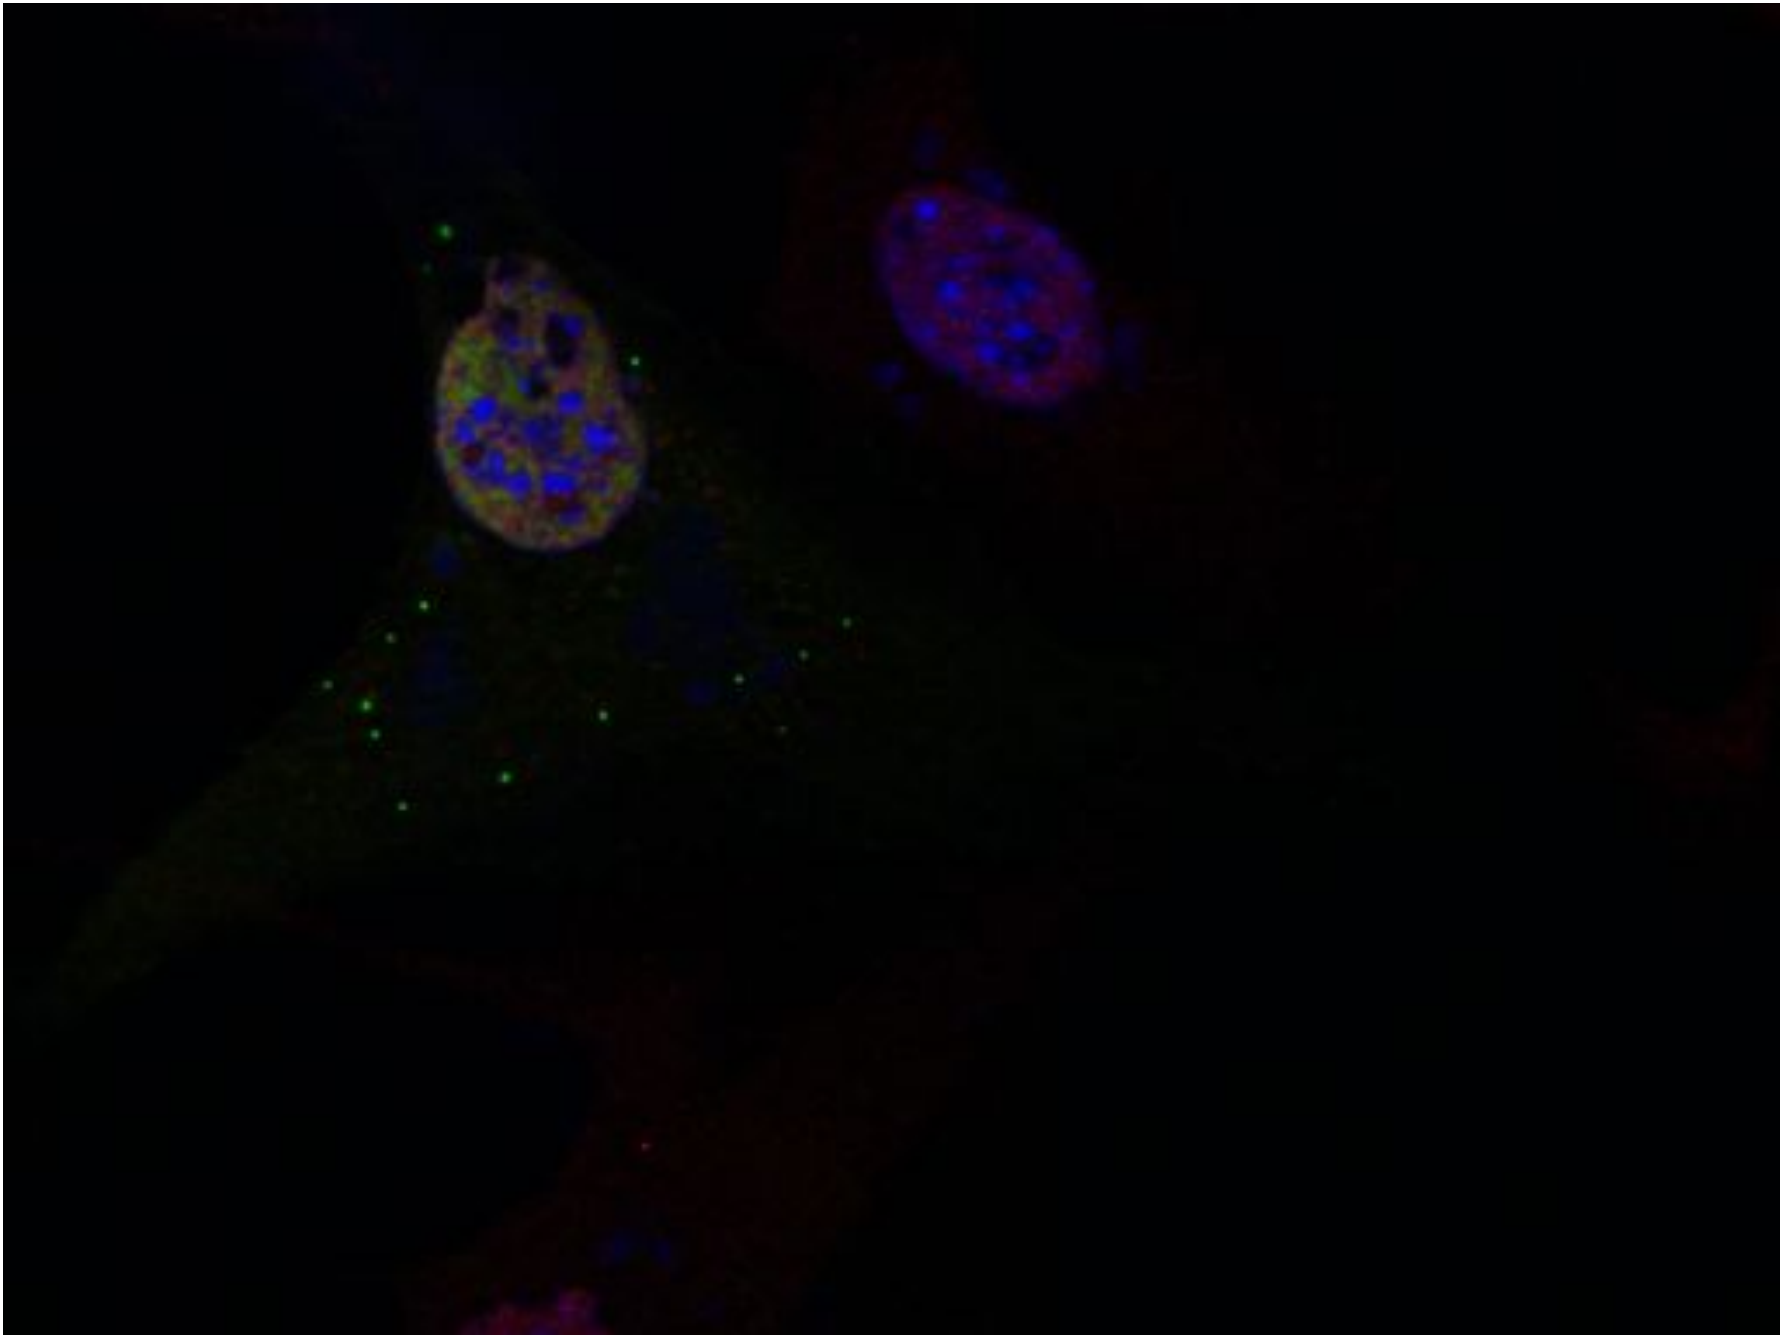

**Fig 2C bottom panels (DYRK1A(K188R))**

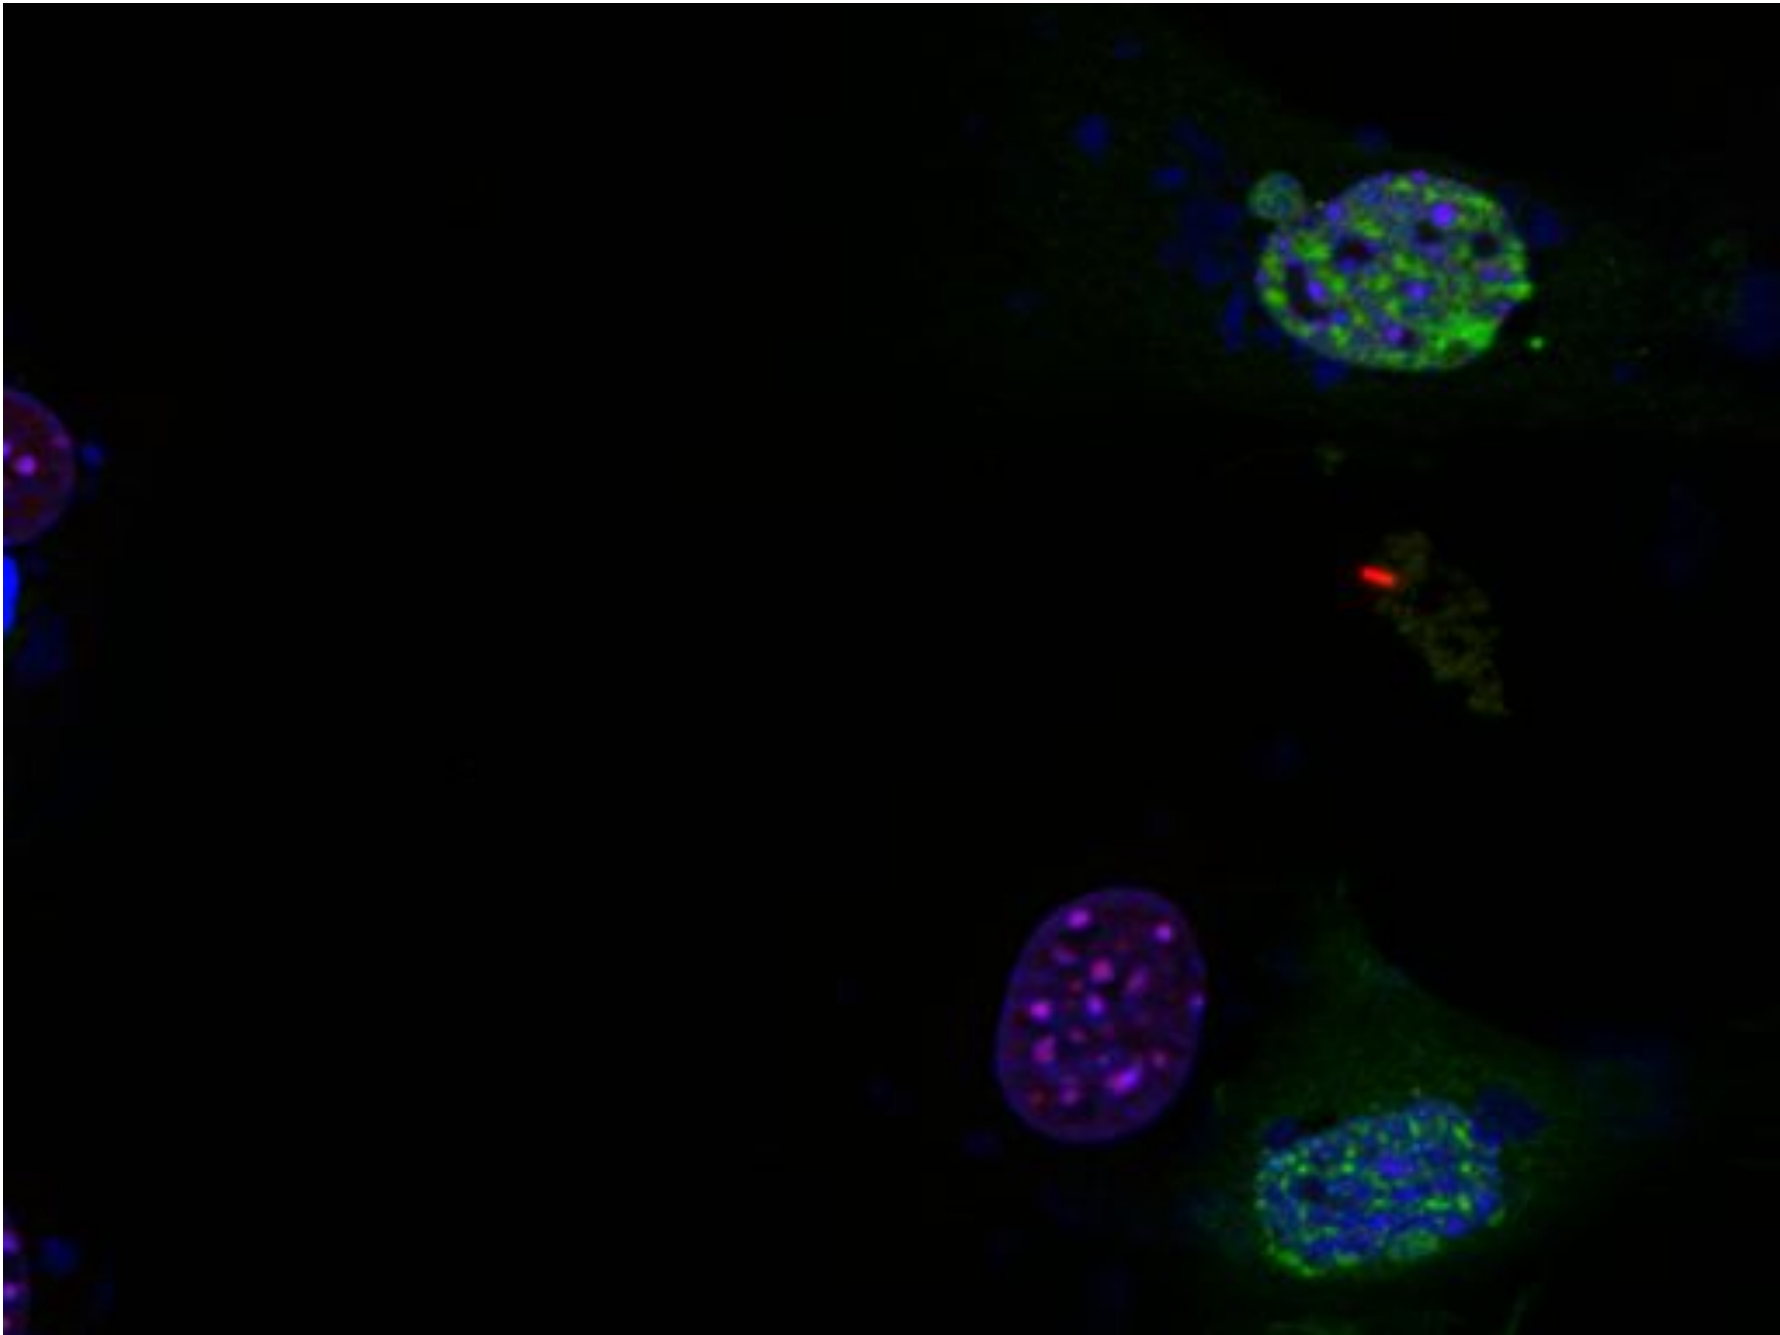

Fig 2D top panels (DYRK1A)

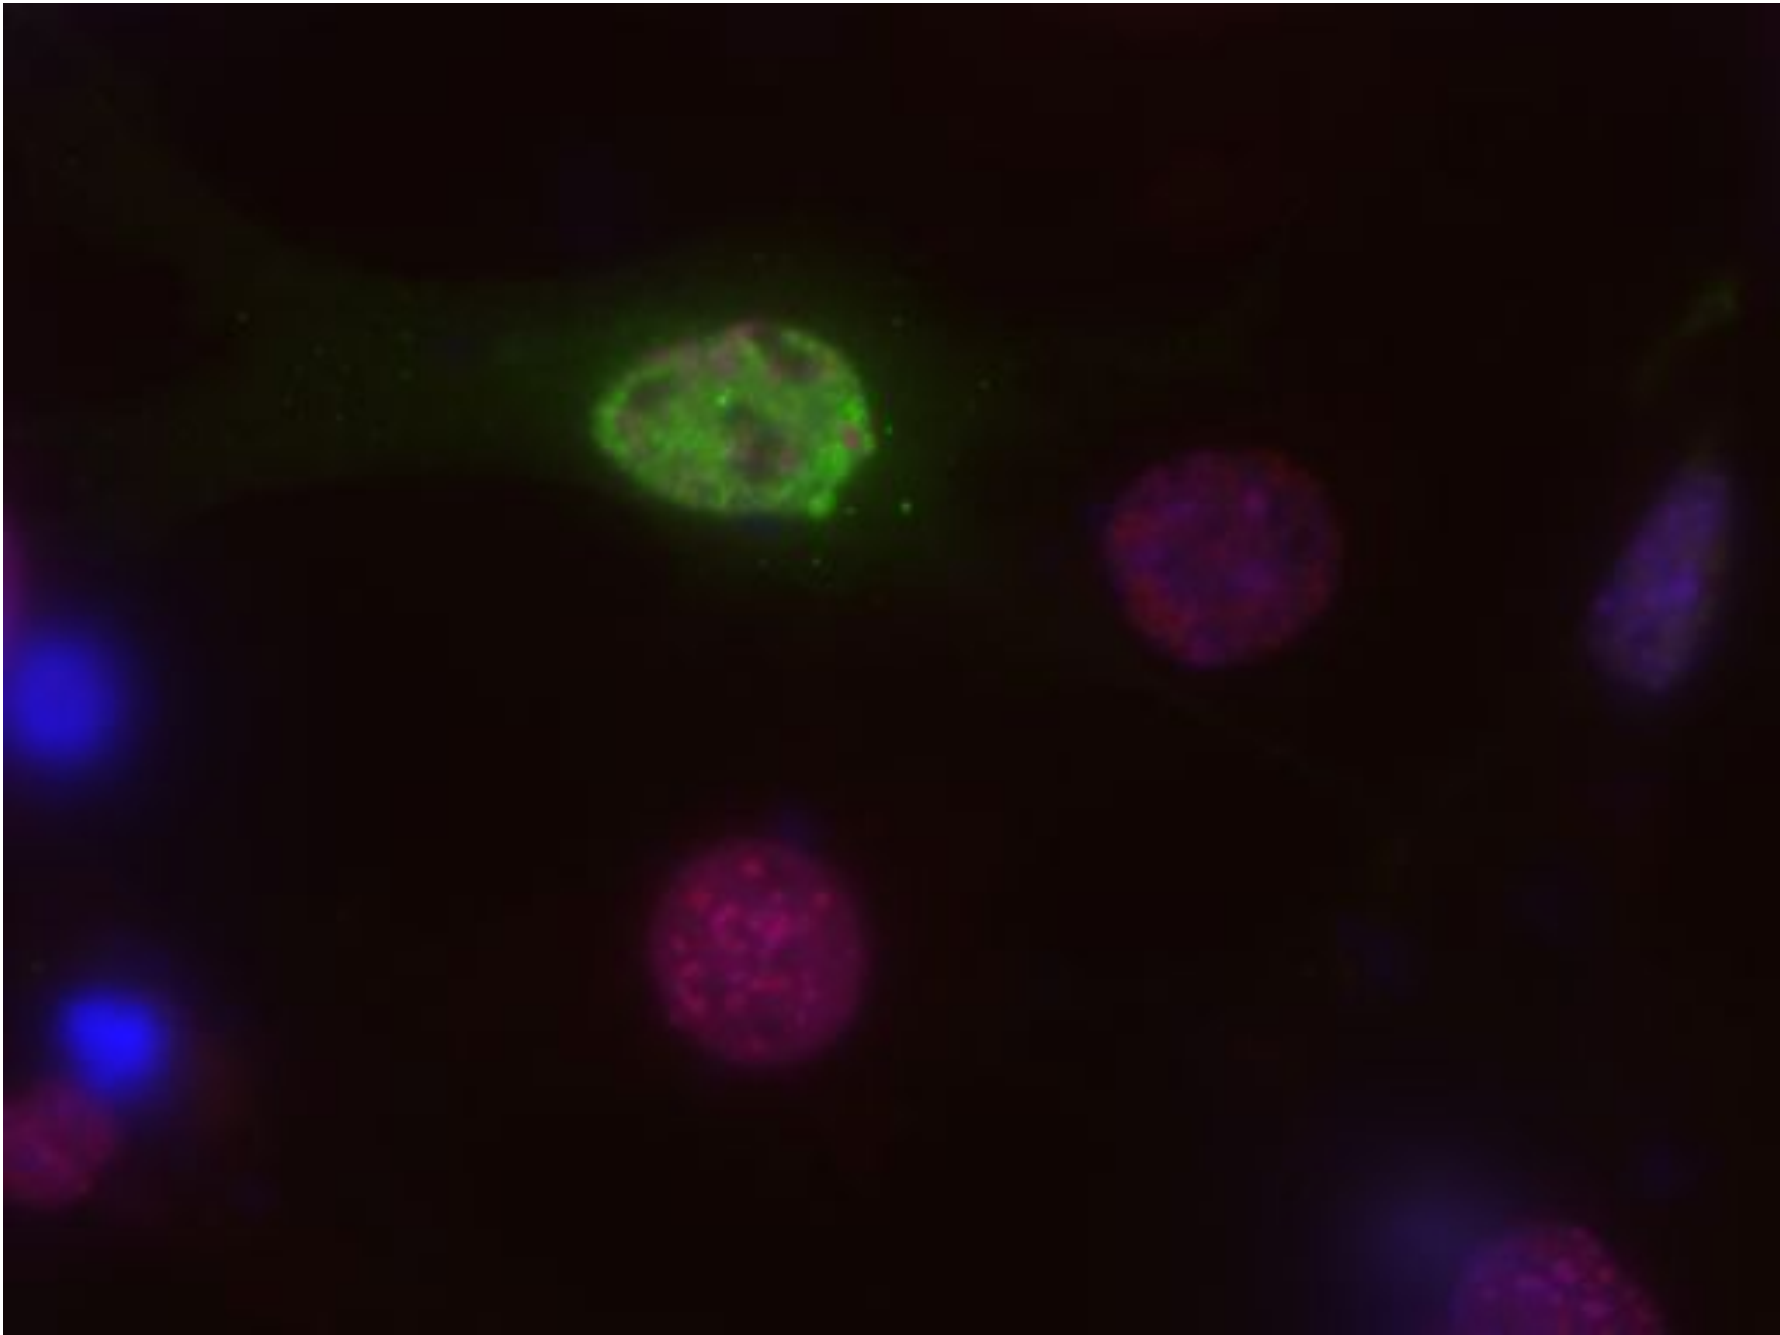

Fig 2D bottom panels (DYRK1A(K188R))



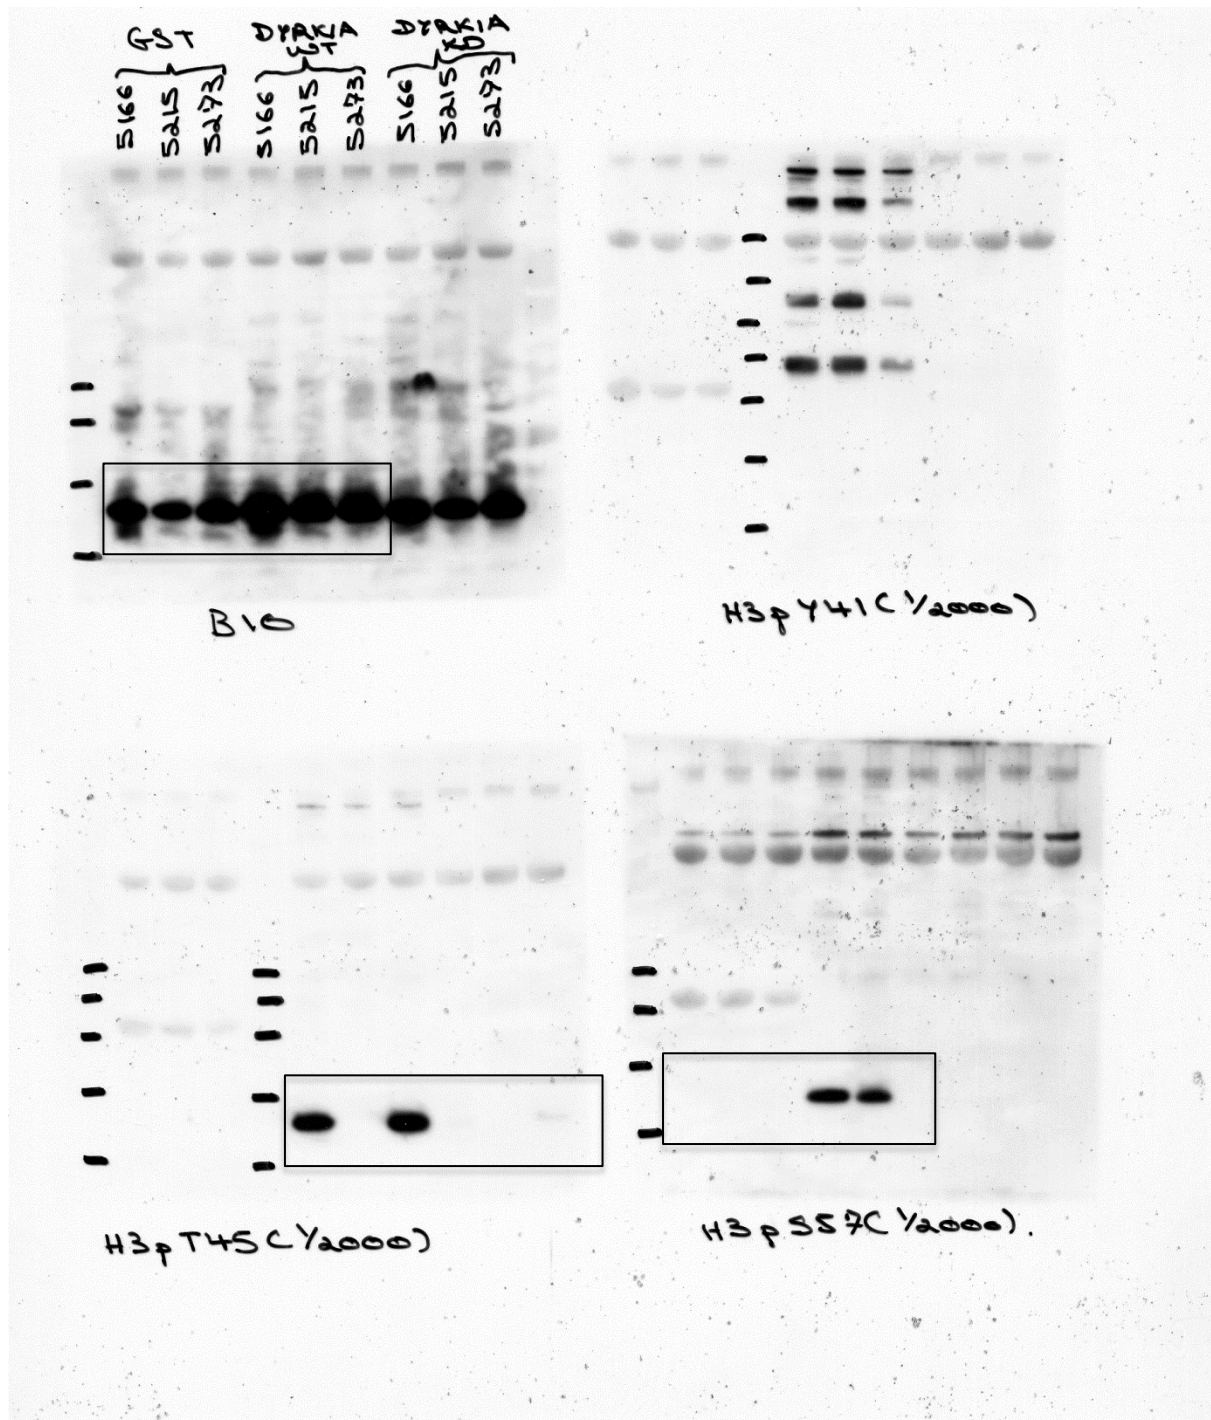

Fig 2E
